# Supplementary material for: The effects of recycling on the properties of carbon nanotube-filled polypropylene composites and worker exposures
Source: Royal Society of Chemistry journal article supplement (doi:10.1039/c5en00253b), 2016-01-01
Supplement: c5en00253b1.pdf [file c5en00253b1.pdf]

## Supporting Information

Accepted 00th January 20xx

DOI: 10.1039/x0xx00000x

[www.rsc.org/](http://www.rsc.org/)

# The Effects of Recycling on the Properties of Carbon Nanotube-Filled Polypropylene Composites and Worker Exposures

Jinde Zhang,<sup>a</sup> Artee Panwar,<sup>a</sup> Dhimiter Bello,<sup>b</sup> Tim Jozokos<sup>d</sup> Jacqueline A. Isaacs,<sup>c</sup> Carol Barry,<sup>a</sup> Joey Mead,<sup>a</sup>

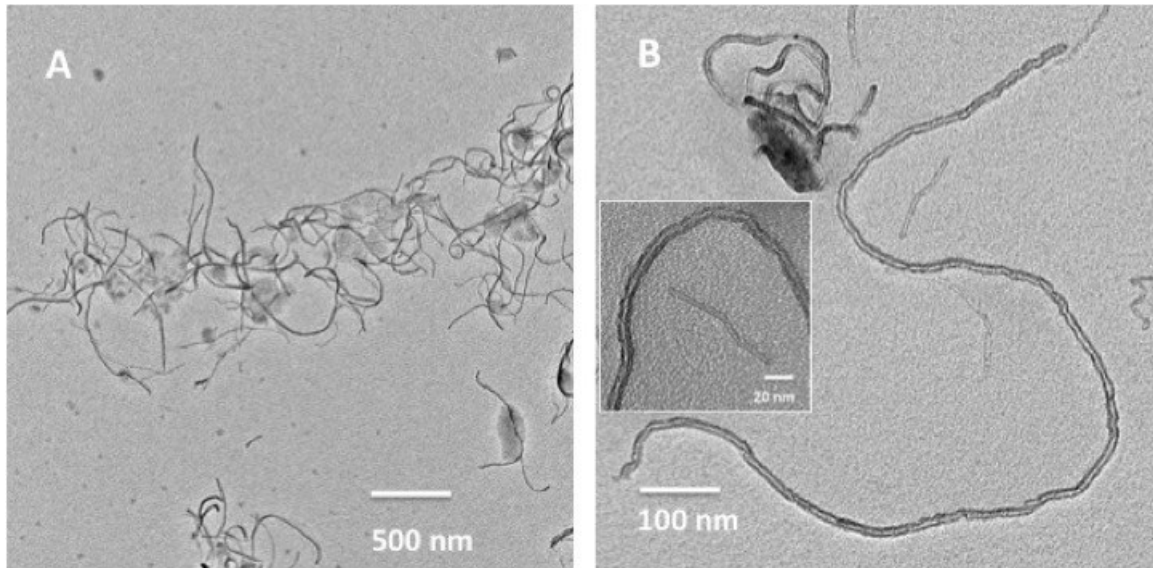

Figure 1. Morphology of raw CNTs following sonication, dispersion and drop casting on a TEM grid. Good agreement was observed between these images and those obtained from microtome slices of CNT-PP composites and dispersion of CNTs following dissolution of residual ash after thermogravimetric analysis of CNT-PP composite pellets and ground dust (data omitted).

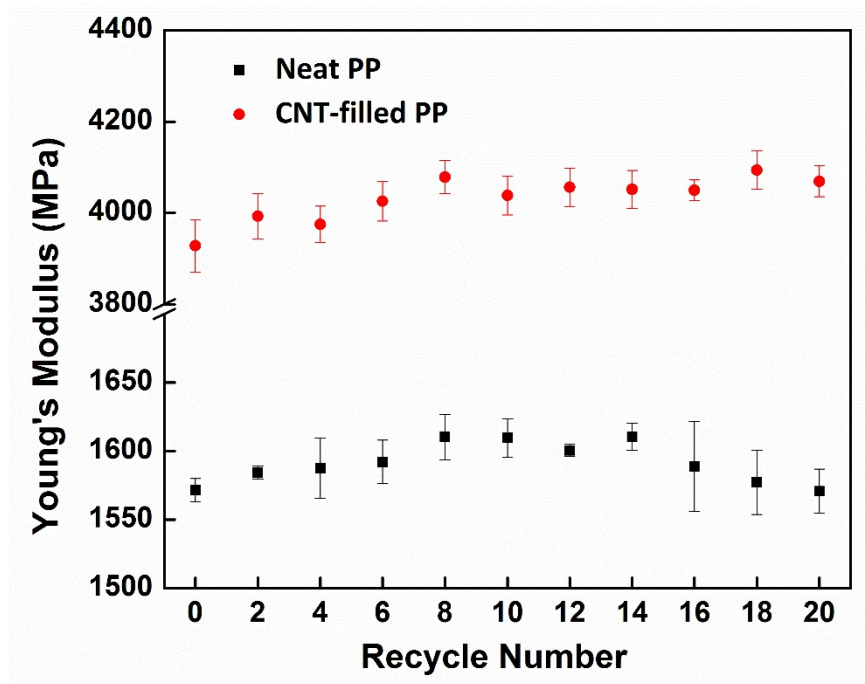

Figure 2. Young's Modulus of recycled neat PP and 3 wt. % CNT-filled PP.

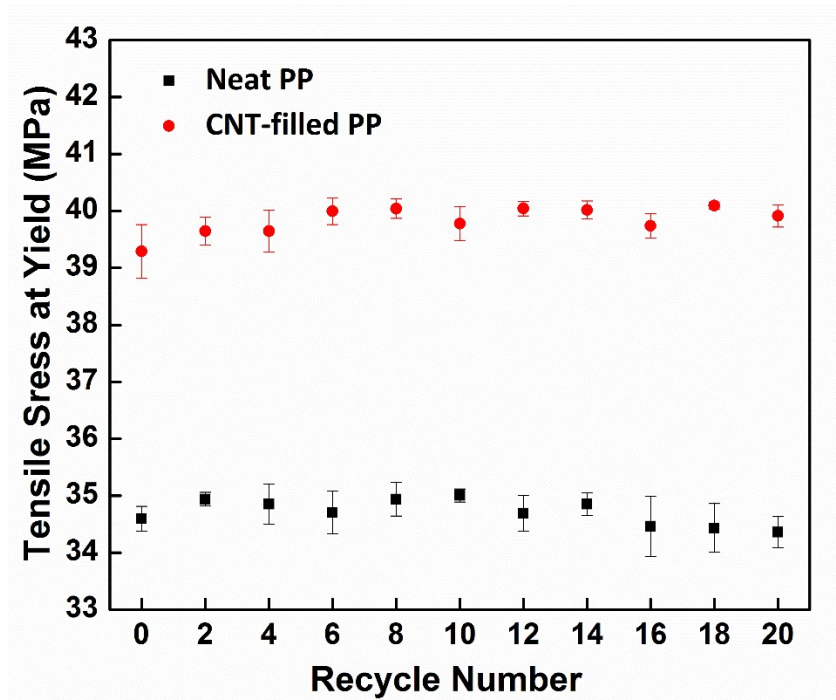

Figure 3. The tensile stress at yield of recycled neat PP and 3 wt. % CNT-filled PP.

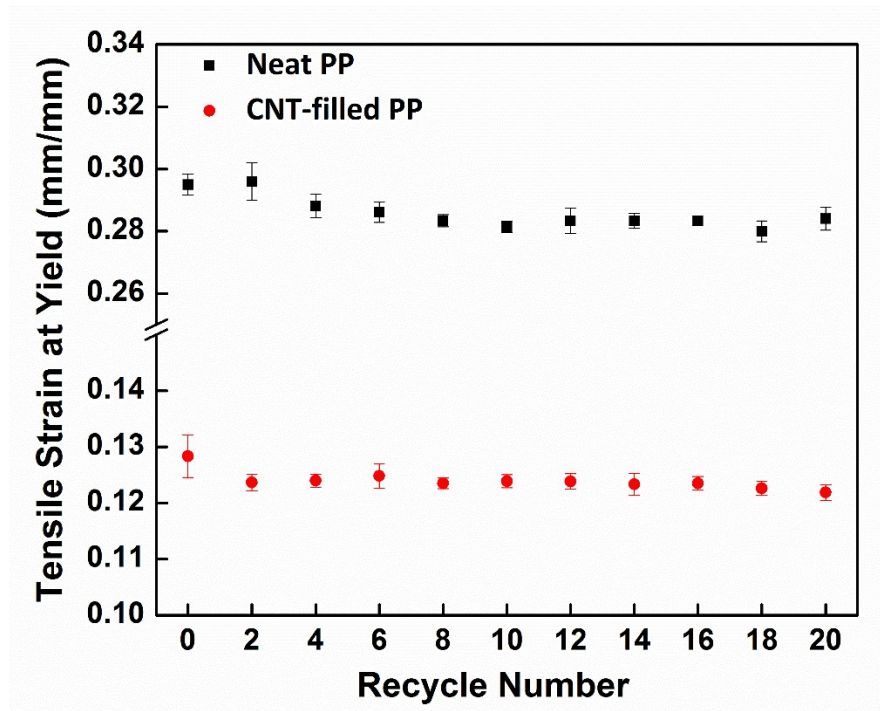

Figure 4. The tensile strain at yield of recycled neat PP and 3 wt. % CNT-filled PP.

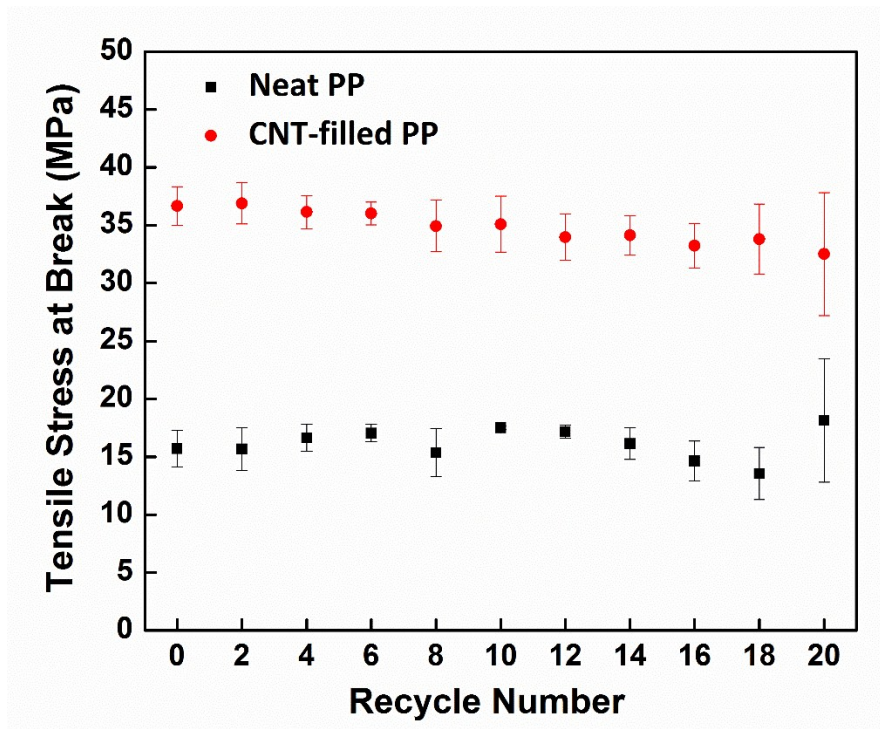

Figure 5. The tensile stress at break of recycled neat PP and 3 wt. % CNT-filled PP.



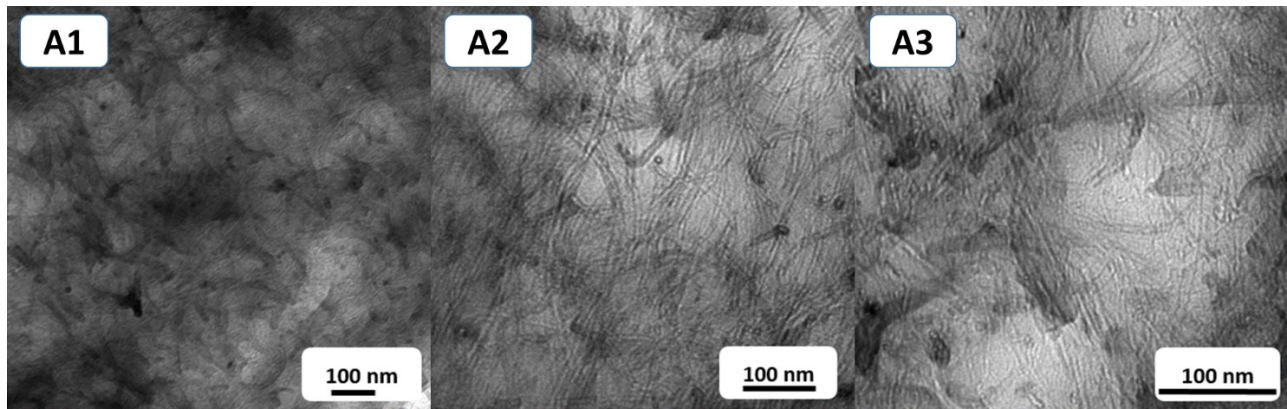

Figure 6. TEM images of masterbatch CNT-filled PP.

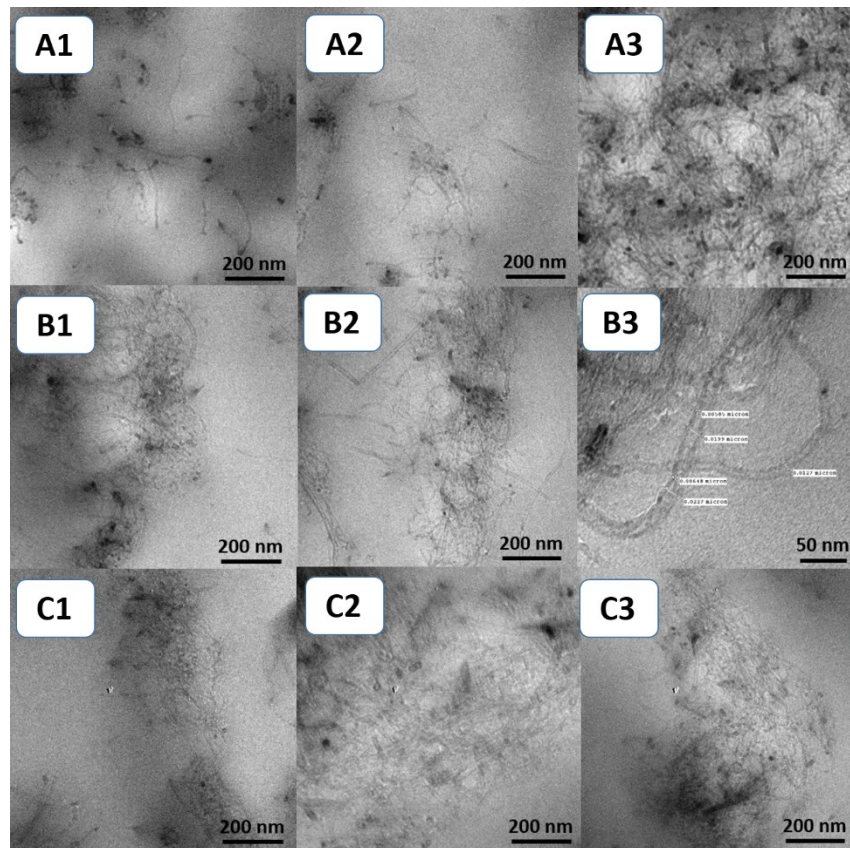

Figure 7. TEM images of recycled 3 wt. % CNT-filled PP: 0 runs (A1-3), 10 runs (B1-3), 20 runs (C1-3).
